# Supplementary material for: Mutational dynamics of murine angiogenin duplicates
Source: PubMed Central journal article supplement (PMC2964713; doi:10.1186/1471-2148-10-310), 2010-10-15
Supplement: 1471-2148-10-310-S1.pdf [file 1471-2148-10-310-S1.pdf]

10 20 30 40 50 60 70 80  
H\_sapiens ATGGTGATG GGCTGGGCGTTTTGTTGTTGGTCTTCGTGCTGGGTCCTGGGTCCTGACCCACCCGACCCCTG GCT  
M\_musculus1 ATGGCGATA AGCCAGGCCCGTTGTTCTTGATCTTCGTGCTGGGTCCTGGTTGTGATCCCTCCCACCTCTG GCT  
M\_musculus2 ATGGCGATG AGCCAGGTCCTTTGTTCTTGGTCTTCCTGTTGGTCTGGTTGTGATCCCTCCCACCTCTG TCT  
M\_musculus3 ATGGTGATG AGCCAGGTCCTTTGTTGTTGGTCTTCCTGTTGGTCTGGATGTGATCCCTCCCACCTCTG GCT  
M\_musculus4 ATGACAATG AGCCCATGTCTTTGTTGTTGGTCTTCGTGCTGGGTCCTGGTTGTGATTCCTCCAACCTCTG GCT  
M\_musculus5 ATGGTGATC AGCCAGGTTCTTTGTTGTTGGTCTTTTTGCTGAGTCTGGATGTGATCCCTCCCACCTCTG GCT  
M\_musculus6 ATGGTGATG AGCCAGGTTCTTTGATGTTGGTCTTTGTGCTGAGTCTGGTTGTGATCTCTCCCACCTCTG GCT  
R\_norvegicus1 ATGGAGATG AGCCTGCGTCCCTCTGTTGTCGGTPTTTTGTCTGGGTCCTGGTTTCGACCCCTTCAACTCTG GCT  
R\_norvegicus2 ATGGAGATG AGCCTGCGCCCTCTGTTGTTGGTTTTTTGTGCTGAGTCTGGTTGCGACCCCTTCAACTCTG GCT  
T\_francoisi ATGGTGATG GGCTTGGGCTTTTTCTTGTTGGTCTTCATGCTGGGTCCTGGGTCCTGACCCACCCACCCCTG GCT  
P\_avunculus ATGGTGATG GGCTTGGGCTTTTTCTTGTTGGTCTTCATGCTGGGTCCTGGGTCCTGACCCACCCACCCCTG GCT  
P\_bieti ATGGTGATG GGCTTGGGCTTTTTCTTGTTGGTCTTCATGCTGGGTCCTGGGTCCTGACCCACCCACCCCTG GCT  
P\_roxellana ATGGTGATG GGCTTGGGCTTTTTCTTGTTGGTCTTCATGCTGGGTCCTGGGTCCTGACCCACCCACCCCTG GCT  
P\_pygmaeus ATGGTGATG GGCTTGGGCTTTTTGTTGTTGGTCTTCATGCTGGGTCCTGGGTCCTGACCCACCAACCCCTG GCT  
C\_aethiops ATGGTGATG GGCTTGGGCTTTTTCTTGTTGGTCTTCATGCTGGGTCCTGGGTCCTGACCCACCCACCCCTG GCT  
S\_scrofa ATGGTGATA TTGCTGGGCCCCCTGCTGTTGGTCTTCATGCTGGGTCCTGGGTCCTGGCCCCGTGAGCCCTG GCT  
M\_talapoin ATGGTGATG GGCTTGGGCTTTTTCTTGTTGGTCTTCATGCTGGGTCCTGGGTCCTGACCTCACCCACCTCTG GCT  
P\_troglodytes ATGGTGATG GGCTTGGGCTTTTTGTTGTTGGTCTTCCTGCTGCTGGGTCCTGGGTCCTGACCCACCCGACCCCTG GCT  
M\_mulata ATGGTGATG GGCTTGGGCTTTTTCTTGTTGGTCTTCATGCTGGGTCCTGGGTCCTGACCCACCCACCCCTG GCT  
E\_caballus ATGGCGATG AGCCTGCGCCCCCTTGTTGTTGGTCTTCCTGCTGGGTCCTGGGTCCTGACCCACCCATCCCTG GCT  
S\_oedipus ATGGTGATG GGCTTGACCTTTTTGTTTTGGTCTTCATTCCTGGGTCCTGGGTCCTGACCCACCAACTCTG GCT  
B\_taurus ATGGTCATG GTCTGAGCCCCCTGTTTTGGTCTTCATACTGGGTCCTGGGTCCTGACCCACAGTGGCCCCG GCT  
S\_sciureus ATGGTGATG GGCCCGACCTTTTTGTTGTTGGTCTTCATTCCTGGGTCCTGGGTCCTGACCCACCCGACTCTG GCT  
A\_trivirgatus ATGGTGATG GGCTTGACCTTTTTGTTGTTGGTCTTCATTCCTGGGTCCTGGGTCCTGACCCACCCGACTCTG GCG  
P\_hamadryas ATGGTGATG GGCTTGGGCTTTTTCTTGTTGGTCTTCATGCTGGGTCCTGGGTCCTGACCCACCCACCCCTG GCT  
C\_guereza ATGGTGATG GGCTTGGGCTTTTTCTTGTTGGTTTTTCTGCTGGGTCCTGGGTCCTGACCCACCCACCCCTG GCT  
M\_domestica ATGGTGATGTTTCTTAAGGCCATGGAACCTTTCTTGCTGCTCTTCATCCTGGGGCTATGGCTGGTTCCACCTTCTTGACCACA

110 120 130 140 150 160 170 180  
H\_sapiens ACACACACTTCCTGACCCAGCACTATGATGCCAAAACACAGGGCCGGGATGACAGATACCTGTGAAAGCATCATGAGGAGACGGG  
M\_musculus1 ACACAAAATTCCTGACTCAGCACTATGATGCCAAAGCCAAAGGGCCGGGACGACAGATACCTGTGAAAGTATGATGAAGAGAAGAA  
M\_musculus2 ACACAAAATTCCTGACTCAGCACTATGATGCCAAAGCCAAAGGGCCGGGACGACAGATACCTGCGAAAGTATGATGGTGAAGAA  
M\_musculus3 ACATAAAATTCCTGACTCAGCACTATGATGCCAAAGCCAACTGGCCGGGATACAGATACCTGCGAAAGTATGATGAAGAAAAGAA  
M\_musculus4 ACAAAAATTCCTGACTCAGCACTATGATGCCAAAGCCAAAGGGCCGGGACGACAGATACCTGTGAAAGTATGATGAAGAAAAGAA  
M\_musculus5 ACAAAAATTCCTGACTCAGCACTATGATGCCAAAGCCAACTGGCCGGGATACAGATACCTGTGAAAGTATGATGAAGAAAAGAA  
M\_musculus6 ACATAAAATTCCTGACTCAGCACTATGATGCCAAAGCCAAAGGGCTGGGATCACAGATACCTGTTATCTGTGATGATGAAGAAA  
R\_norvegicus1 ACACGAAGTTCTGACTCAGCACTATGATGCCAAAGCCAAAGGGTCGGGATGCCAGATACCTGCGAAAGTATGATGAGGAGAAGAG  
R\_norvegicus2 ACACGAAGTTCTGACTCAGCACTATGATGCCAAAGCCAAAGGGTCGGGATGCCAGATACCTGCGAAAGCATGATGAAGAGAAGAG  
T\_francoisi ACAGAGACTTCCTGACCAAGCACTATGATGCCAACACCACAGGGCCGGAAATGACAGATACCTGTGAAAGCATGATGAGGAGACGGG  
P\_avunculus ACAGAGACTTCCTGACCAAGCACTATGATGCCAACACCACAGGGCCGGAAATGACAGATACCTGTGAAAGCATGATGAGGAGACGGG  
P\_bieti ACAGAGACTTCCTGACCAAGCACTATGATGCCAACACCACAGGGCCGGAAATGACAGATACCTGTGAAAGCATGATGAGGAGACGGG  
P\_roxellana ACAGAGACTTCCTGACCAAGCACTATGATGCCAACACCACAGGGCCGGAAATGACAGATACCTGTGAAAGCATGATGAGGAGACGGG  
P\_pygmaeus ACAGAGACTTCCTGGCCAGCACTATGATGCCAAAACACAGGGCCGGGATGACAGATACCTGTGAAAGCATCATGAGGAGACGGG  
C\_aethiops ACAGAGACTTCCTGGCCAGCACTATGATGCCAACACCACAGGGCCGGAAATGACAGATACCTGTGAAAGCACGATGAGGAGACGAC  
S\_scrofa ACACACACTTCCTGACCCAGCACTACGATGCCAAAACAAAGGGCCGGGATGGCAGATACCTGTGAAAGCATAAATGAAGCAACGAG  
M\_talapoin ACAGAGACTTCCTGAGCAAGCACTATGATGCCAGACCACAGGGCCGGAAATGACAGATACCTGCGACAGCATGATGAGGAGACAGG  
P\_troglodytes ACACACACTTCCTGACCCAGCACTATGATGCCAAAACACAGGGCCGGGATCACAGATACCTGTGAAAGCATCATGAGGAGACGGG  
M\_mulata ACAGAGACTTCCTGGCCAGCACTATGATGCCAACACCACAGGGCCGGAAATGACAGATACCTGTGAAAGCACAATGAGGAGACGGC  
E\_caballus ACAGACAGTTCTGACCAAGCACTATGATGCCAAATCCAAGGGGGCCGGAAATGACAGATACCTGTGAAAGCATGATGGTGAAGCGAC  
S\_oedipus ACAACAGGTTCTGGAAGAGCACTATGATCCCAAAAACAAAGAACGGGAAATGACAGATACCTGTGATAAAATGATGCGCTTAAGGA  
B\_taurus ACATACACTTCCTGACCCAGCACTACGATGCCAAAACAAAGGGCCGGAAATGACGAAATCTGTTTTAAACATGATGAAAATCGAC  
S\_sciureus ACATCAAGTTCTGACCCAGCACTATGATGCCAAAACAAAGAACGGGAAATGACGAAATCTGTTTTAAACATGATGAAAATCGAC  
A\_trivirgatus ACATCAAGTTCTGGAACAGCACTATGATCCCAAAAACAAAGAACGGGAAATGACAAATACCTGTGAAAAATGATGAGGTTAAGGA  
P\_hamadryas ACAGAGACTTCCTGGCCAGCACTATGATGCCAACACCACAGGGCCGGAAATGACAGATACCTGTGAAAGCACGATGAGGAGACGGC  
C\_guereza ACAGAGACTTCCTGACCAAGCACTATGATGCCAACACCACAGGGCCGGAAATGACAGATACCTGTGAAAGCAAGATGAGGAAACTGG  
M\_domestica AGAAACACTTCCTGATTCAGCACTATGACTCCAAAACAAAGGGCCGGGATGACAAATACCTGTACAGCGATCATGAGACAGAGAG

210 220 230 240 250 260 270 280  
H\_sapiens ACCCTGCAAAGACATCAACACATTTATTCATGGCAAACAGCGCAGCATCAAGGCCATCTGTGAAAACAAGAAATGGAAACCCCTCA  
M\_musculus1 ACCCTGCAAAGATGTCAAACACCTTTATCCATGGCAAACAGAGCAACATCAAGGCCATCTGTGGAGCGAAAT GGAAGCCCTTA  
M\_musculus2 TTTCTGCAAAGATGTCAAACACCTTTATCCATGACCAAGAAACAACATCAAGGCCATCTGTGGAAAGAAA GGAAGCCCTTA  
M\_musculus3 GCCTTGCAAAGAGTCAACACCTTTATTCATGACCAAGAAACAACATCAAGGCCATCTGTGGAGAGAAAT GGAAGGCCCTTA  
M\_musculus4 GCCTTGCAAAGATGTCAAACACCTTTATCCATGGCAACAAAGAAAACATCAGGGCCATCTGTGGAAAGAAA GGAAGCCCTTA  
M\_musculus5 ACCTTGCAAAGAAATCAACACCTTTATCCATGACCAAGAAACAACATCAAGGCCATCTGTGGAGAGAAAT GGAAGGCCCTTA  
M\_musculus6 GAAATGCAAAGAAAGCCAAACACCTTTATCCATGACCAAGAAAAAACATCAAGGCCATCTGTGGAGAGAAAT GGAGGCCCTTA  
R\_norvegicus1 GCCCTGCAAAGAGGTCAACACCTTTATCCATGGCAACAAAGGGCAGCATCAAGGCCATCTGTGGCGGAAAT GGAAGCCCTTA  
R\_norvegicus2 GCCCTGCAAAGAGGTCAACACCTTTATCCATGGCAATAAGGGCAGCATCAAGGCCATCTGTGGTGGCGAAAT GGAAGCCCTTA  
T\_francoisi ACCCTGCAAAGACATCAACACCTTTATTCATGGCAAACAGTCGCCACATCAAGGCCATCTGTGGAGATGAGAAATGGAAACCCCTTA  
P\_avunculus ACCCTGCAAAGACATCAACACCTTTATTCATGGCAAACAGTCGCCACATCAAGGCCATCTGTGGAGATGAGAAATGGAAACCCCTTA  
P\_bieti ACCCTGCAAAGACATCAACACCTTTATTCATGGCAAACAGTCGCCACATCAAGGCCATCTGTGGAGATGAGAAATGGAAACCCCTTA  
P\_roxellana ACCCTGCAAAGACATCAACACCTTTATTCATGGCAAACAGTCGCCACATCAAGGCCATCTGTGGAGATGAGAAATGGAAACCCCTTA

pygmaeus ACCCTGCAAAGGCATCAACACATTTATTTCATGGCAGCAAGCGCAGCATCAAGGCCATCTGTGAAAAA  
C\_aethiops ACCCTGCAAAGACATCAACACCTTTATTTCATGGCAACAGGCACCAATCAAGGCCATCTGTG  
S\_scrofa ACCCTGCAAAGAGGTCAACACCTTTATTTCATGGCACGAGGAATGATATCAAGGCCATCTGT  
M\_talapoin ACCCTGCAAAGACATCAACACCTTTATTTCATGGCAACAGGCAGCATCAGGGCCATCTGT  
P\_troglodytes ACCCTGCAAAGACATCAACACATTTATTTCATGGCAACAGGCAGCATCAAGGCCATCTGT  
M\_mulata ACCCTGCAAAGACATCAACACCTTTATTTCATGGCAACAGGCACCAATCAAGGCCATCTGT  
E\_caballus ACCCTGCAAAGACACCAACACTTTTATTTCATGGCAGCAAGAGCAGCATCAAGGCCATCTGT  
S\_oedipus ACCCTGCAAAGCAATCAACACCTTTATTTCATGGCAAGAGGAGAGCATCAAGGCCATCTGT  
B\_taurus ACCCTGCAAAGACCGCAACACCTTTATTTCATGGCAACAGAAATGACATTAAGGCCATCTGT  
S\_sciureus ACCCTGCAAAGAAATCAACACCTTTATTTCATGGCAACAGGCCAGCATCAAGGCCATCTGT  
A\_trivirgatus ACCCTGCAAAGAAATCAACACCTTTATTTCATGGCAACAGGCCAGCATCAAGGCCATCTGT  
P\_hamadryas ACCCTGCAAAGACACCAACACCTTTATTTCATGGCAACAGGCACCAATCAAGGCCATCTGT  
C\_guereza ACCCTGCAAAGCCATCAACACCTTTATTTCATGGCAACAGTCGCCACATCAAGGCCATCTGT  
M\_domestica GCCCTGCAAGGATATGAATACCTTCATCCATGGTGATTACCTTAGCATCAAGGCTGTCTGTGGAGATAAAGCTGGGAATCCCTA

310 320 330 340 350 360 370 380

H\_sapiens AGAATAAGCAAGTCTTCTTTCCAGGTCAACCCTTGCAAGCTACATGGAGGTTCCCCCTGGCC  
M\_musculus1 AGAATGAGCAAGTCTCCCTTCCAGGTCAACCCTTGCAAGCACACAGGAGGGTCTCCCGG  
M\_musculus2 AGAATAAGCAAGTCTCACTTCCAGGTCAACCCTTGCAACACAAAGGAGGGTCTCCCGG  
M\_musculus3 AGAATAAGCAATTTCTCGATTCAGGTCAACCCTTGCAACGACAAAGGAGGGTCTCCCGG  
M\_musculus4 AGAATAAGCAATTTCTCCCTTCCAGATCACAACCTTGCAAGCACAAAGGAGGGTCTCCCGG  
M\_musculus5 AGAATAAGCAATTTCTCGCTTCCAGATCACAACCTTGCAAGCACAAAGGAGGGTCTCCCGG  
M\_musculus6 AGAATAAGCAATTTCTCCCTTCCAGATCACCACCTTGCAATCACTCAGGAGGGTCTCCCGG  
R\_norvegicus1 AGAATAAGCCAGTCTCCCTTCCAGATCACCACCTTGCAAGCATACAGGAGGGTCTCCCGG  
R\_norvegicus2 AGAATAAGCCAGTCTCCCTTCCAGATCACCACCTTGCAAGCATACAGGAGGGTCTCCCGG  
T\_francoisi AGAATAAGCAAGTCTCCCTTCCAGGTCAACCCTTGCAACCTACGTGGAGGATCCCCCTGGCC  
P\_avunculus AGAATAAGCAAGTCTCCCTTCCAGGTCAACCCTTGCAACCTACGTGGAGGATCCCTCCCGG  
P\_bieti AGAATAAGCAAGTCTCCCTTCCAGGTCAACCCTTGCAACCTACGTGGAGGATCCCTCCCGG  
P\_roxellana AGAATAAGCAAGTCTCCCTTCCAGGTCAACCCTTGCAACCTACGTGGAGGATCCCTCCCGG  
P\_pygmaeus AGAATAAGCAAGTCTTCTTTCCAGGTCAACCCTTGCAAGCTACATGGAGGGTCCCCCTGGCC  
C\_aethiops AGAATAAGCAAGTCTCCCTTCCAGGTCAACCCTTGCAACCTACGTGGAGGATCCCCCGG  
S\_scrofa AGAAGAAGCAAGTCTCCCTTCCAAATTAACACTTGCAAGCATAAAGGAGGGTCCAAACCGG  
M\_talapoin AGAATAAGCAGGACTCCCTTCCAGGTCAACCCTTGCAACCTACGTGGAGGATCCCCCGG  
P\_troglodytes AGAATAAGCAAGTCTTCTTTCCAGGTCAACCCTTGCAAGCTACATGGAGGGTCCCCCTGGCC  
M\_mulata AGAATAAGCACGTCTCCCTTCCAGGTCAACCCTTGCAAACTACGTGGAGGATCCCCCGG  
E\_caballus AGAATAAGCAAGTCTGTTTTCCAGGTCAACCCTTGCAAGCATCAGGAGGGTCCCCCGG  
S\_oedipus AGAAAAAGCAAGTCTGCTTTCCAGGTCAACCCTTGCAAGCATAGAGGAGGGTCCCCCGG  
B\_taurus AGAATAAGCAAGTCTGAAATCCAGATCACCATTTGCAAGCATAAAGGAGGGTCCCTCCCGG  
S\_sciureus AGAATAAGCACGTCTGCTTTCCAGGTCAACCATTTGCAAGCATATAGGAGGGTCCCCCGG  
A\_trivirgatus AGAATAAGCAAGTCTGCTTTCCAGGTCAACCATTTGCAAGCATATAGGAGGGTCCCCCGG  
P\_hamadryas AGAATAAGCAAGTCTCCCTTTCCAGGTCAACCCTTGCAAGCTACATGGAGGATCCCCCGG  
C\_guereza AGAATAAGCAAGTCTCCCTTCCAGGTCAACCCTTGCAACCTACGTGGAGGATCCCCCGG  
M\_domestica AGAATAAGCAAGTCAAGATTTCCAGGTCACTAACTGTGAGCATCGAGGAGGGTCTACAAAACCTCCCTGCAAGTACAGGGCCACT

410 420 430 440 450 460 470 480

H\_sapiens TTGTTGTTGCTTGTGAAAAATGGCTTACCTGTCCACTTGGATCAGTCAAATTTTCCGT  
M\_musculus1 TTGTTATTGCCTGTGAGAATGGCTTGGCGTCCACTTCGATGAGTCAATTTTTC  
M\_musculus2 TTATTATTGGCTGTGAGAATGGCTGGCCTGTCCACTTCGATGAGTCTTTTATC  
M\_musculus3 TTGTTATTGCCTGTGAAGATGGCTGGCCTGTCCACTTCGATGAGTCTTTTATC  
M\_musculus4 TTGTTATTGCCTGTGAAGATGGCTGGCCTGTCCACTTCGATGAGTCTTTTATC  
M\_musculus5 TTGTTATTGCCTGTGAAGATGGCTGGCCTGTCCACTTCGATGAGTCTTTTATC  
M\_musculus6 TTGTTATTGCCTGTGAAGATGGCTGGCCTGTCCACTTCGATGAGTCTTTTATC  
R\_norvegicus1 TTGTTATTGCCTGTGAAAAATGGCTTGCCTGTCCACTTTGATGAGTCTTTTATC  
R\_norvegicus2 TTGTTATTGCCTGTGAGAATGGCTTGCCTGTCCACTTTGATGAGTCTTTTATCAGTCTCTACTCAGCAGGCCCCCGGCGCAGAC  
T\_francoisi TTGTTGTTGCTTGTGAAAAATGACCTGCCTGTCCACTTGGATCAGTCAAATTTTTC  
P\_avunculus TTGTTGTTGCTTGTGAAAAATGACCTGCCTGTCCACTTGGATCAGTCAAATTTTTC  
P\_bieti TTGTTGTTGCTTGTGAAAAATGACCTGCCTGTCCACTTGGATCAGTCAAATTTTTC  
P\_roxellana TTGTTGTTGCTTGTGAAAAATGACCTGCCTGTCCACTTGGATCAGTCAAATTTTTC  
P\_pygmaeus TTGTTGTTGCTTGTGAAAAATGGCTTACCTGTCCACTTGGATCAGTCAAATTTTCCGT  
C\_aethiops TTGTTGTTGGTGTGAAAAATGGCCTACCTGTCCACTTGGATGAGTCAAATTTTTC  
S\_scrofa TAGCTGTTGCCTGTGAAAAATGGCTTGCCTGTCCACTTTGATGAGTCCPTTATC  
M\_talapoin TTGTTGTTGCTTGTGAAAAATGGCCTACCTGTCCACTTGGATCAGTCAAATTTTTC  
P\_troglodytes TTGTTGTTGCTTGTGAAAAATGGCTTACCTGTCCACTTGGATCAGTCAAATTTTCCGT  
M\_mulata TTGTTGTTGGTTGTGAAAAATGGCCTACCTGTCCACTTGGATGAGTCCATTTTTC  
E\_caballus TTGTCATTGCCTGTGAAAAAGGCCTTGCCTGTCCACTTTGATGAGTCCPTTTTTC  
S\_oedipus TTGTAGTTGCCTGTGAAAAATGGCTTACCTGTCCACTTAGATGAGTCCATTTTTC  
B\_taurus TTGTTGTTCGGCTGTGAAAAATGGCTTGCCTGTCCACTTTGATGAGTCCPTTATC  
S\_sciureus TTGTTATTGCCTGTGAAAAATGGCTTACCTGTCCACTTAGATGAGTCCATTTTTC  
A\_trivirgatus TTGTTGTTGGTGTGAAAAATGACTTACCTGTCCACTTAGATGAGTCCATTTTTC  
P\_hamadryas TTGTTGTTGGTTGTGAAAAATGGCCTACCTGTCCACTTGGATGAGTCCATTTTTC  
C\_guereza TTGTTGTTGCTTGTGAAAAATGACCTACCTGTCCACTTGGATCAGTCAAATTTTTC  
M\_domestica TCATCATTGCCTGTGAGAATAAATTTACCTGTCCACTTGAACAGCCATCATT

```
.....|.....|.....|.....|.....|
H_sapiens          -----CGTCCG-----
M_musculus1       -----AGTCTA-----
M_musculus2       -----AGTCCA-----
M_musculus3       -----AGTCCG-----
M_musculus4       -----AGTCCG-----
M_musculus5       -----AGTATG-----
M_musculus6       -----AGCTTG-----
R_norvegicus1     -----AGCTTC-----
R_norvegicus2     TTTATCTCCCCTCACCCAGAACAC
T_francoisi       -----CATCCG-----
P_avunculus       -----CGTCCG-----
P_bieti           -----CGTCCG-----
P_roxellana       -----CGTCCG-----
P_pygmaeus        -----CGTCTG-----
C_aethiops        -----CGTCCG-----
S_scrofa          -----ATTACAAGCCAG-----
M_talapoin        -----CGTCCG-----
P_troglodytes     -----CGTCCG-----
M_mulata          -----CGTCCG-----
E_caballus        -----CGTCCA-----
S_oedipus         -----CGTCCA-----
B_taurus          -----ACTCCACGCCAC-----
S_sciureus        -----CGTCCG-----
A_trivirgatus     -----CGTCCG-----
P_hamadryas       -----CGTCCG-----
C_guereza         -----CGTCCG-----
M_domestica       -----GCAAAA-----
```
